# Supplementary material
Source: PubMed Central journal article supplement (PMC3736592)
Supplement: NIHMS332383-supplement-Supp_Figure_S1-S2.pdf [file NIHMS332383-supplement-Supp_Figure_S1-S2.pdf]

Supplementary material for Yeats *et al.*

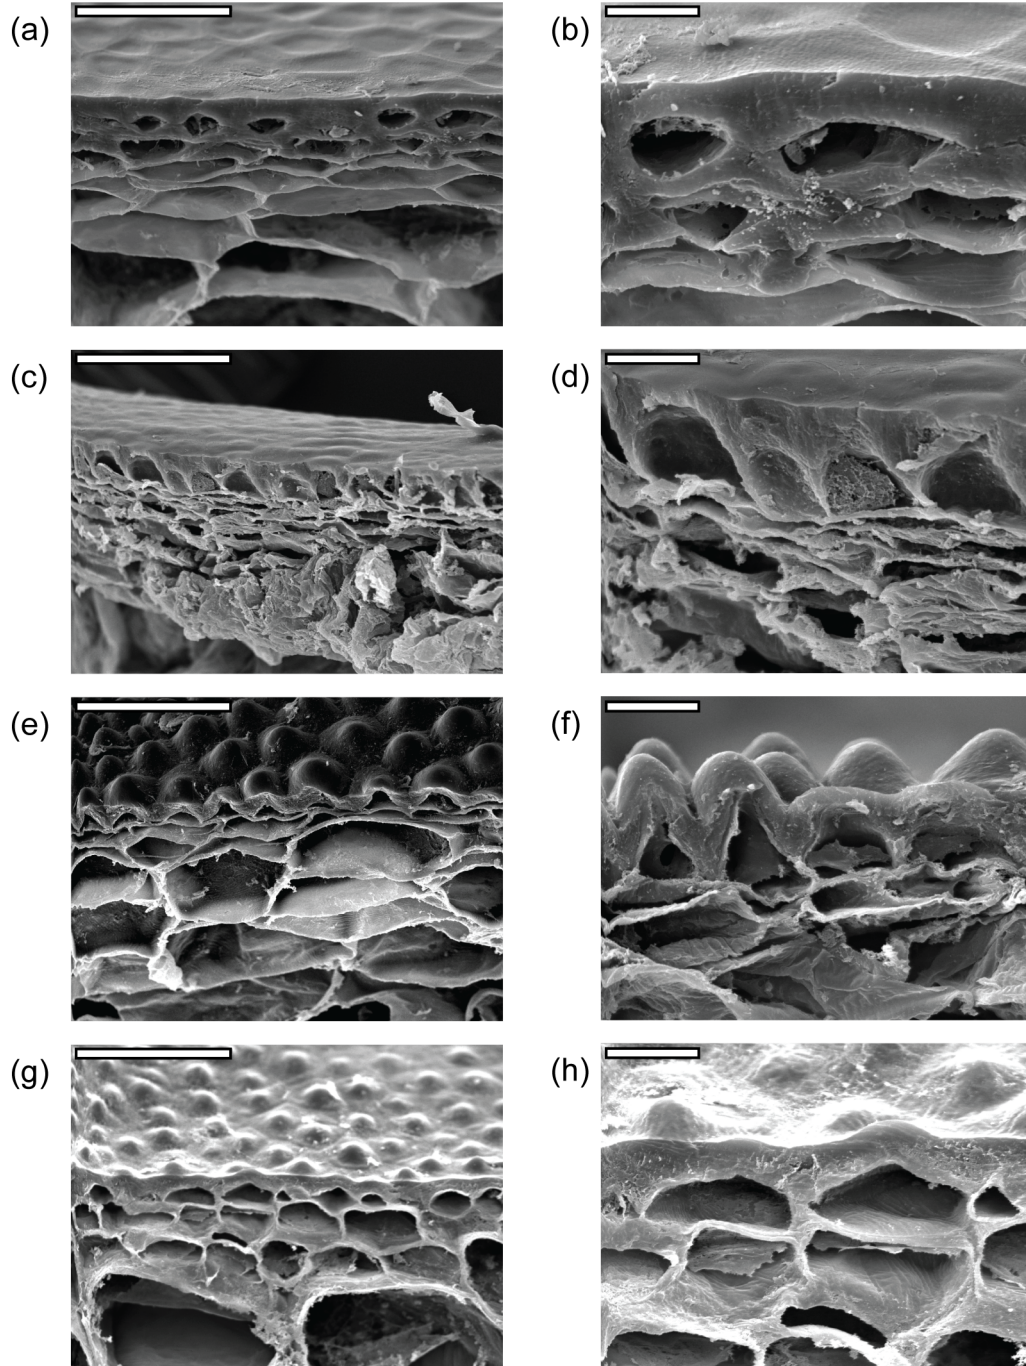

**Figure S1.** SEM micrographs of pericarp of selected *Solanum* species. (a-b). *S. lycopersicum*. (c-d). *S. pimpinellifolium*. (e-f). *S. chmielewskii*. (g-h). *S. habrochaites*.

Scale bars are 100  $\mu\text{m}$  for a, c, e and g and 20  $\mu\text{m}$  for b, d, f and h.

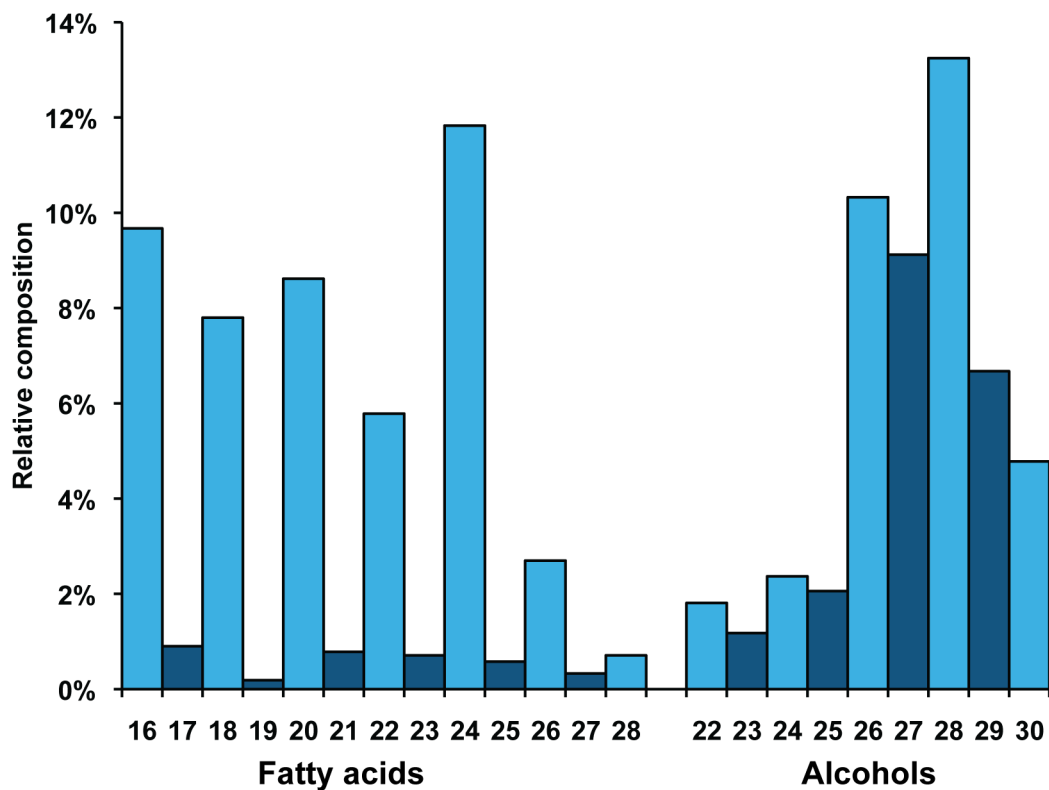

**Figure S2. Chain length distribution of fatty acid and alcohol constituents of the wax ester fraction from *S. neorickii*.** The wax esters were purified by TLC and methanolized with sodium methoxide and the resulting fatty acid methyl esters and alcohols (as TMS ethers) were analyzed by GC.
